# Supplementary material
Source: publisher figshare collection journal article supplement (https://karger.figshare.com/ndownloader/files/14057504)
Supplement: Supplementary file 1 [file 14057504]

FIGURE 1 LEGEND FOR SUPPLEMENTARY FILE

Proteins from Blastophaga psenes. Source: Uniprot database
